# Supplementary material for: Structural insights into pro-aggregation effects of C. elegans CRAM-1 and its human ortholog SERF2
Source: PubMed Central journal article supplement (PMC6173753; doi:10.1038/s41598-018-33143-1), 2018-10-05
Supplement: 41598_2018_33143_MOESM1_ESM.pdf [file 41598_2018_33143_MOESM1_ESM.pdf]

**Structural insights into pro-aggregation effects of *C. elegans* CRAM-1  
and its human ortholog SERF2**

Meenakshisundaram Balasubramaniam, Srinivas Ayyadevara, Robert J. Shmookler Reis

**Supplementary Figure 1**

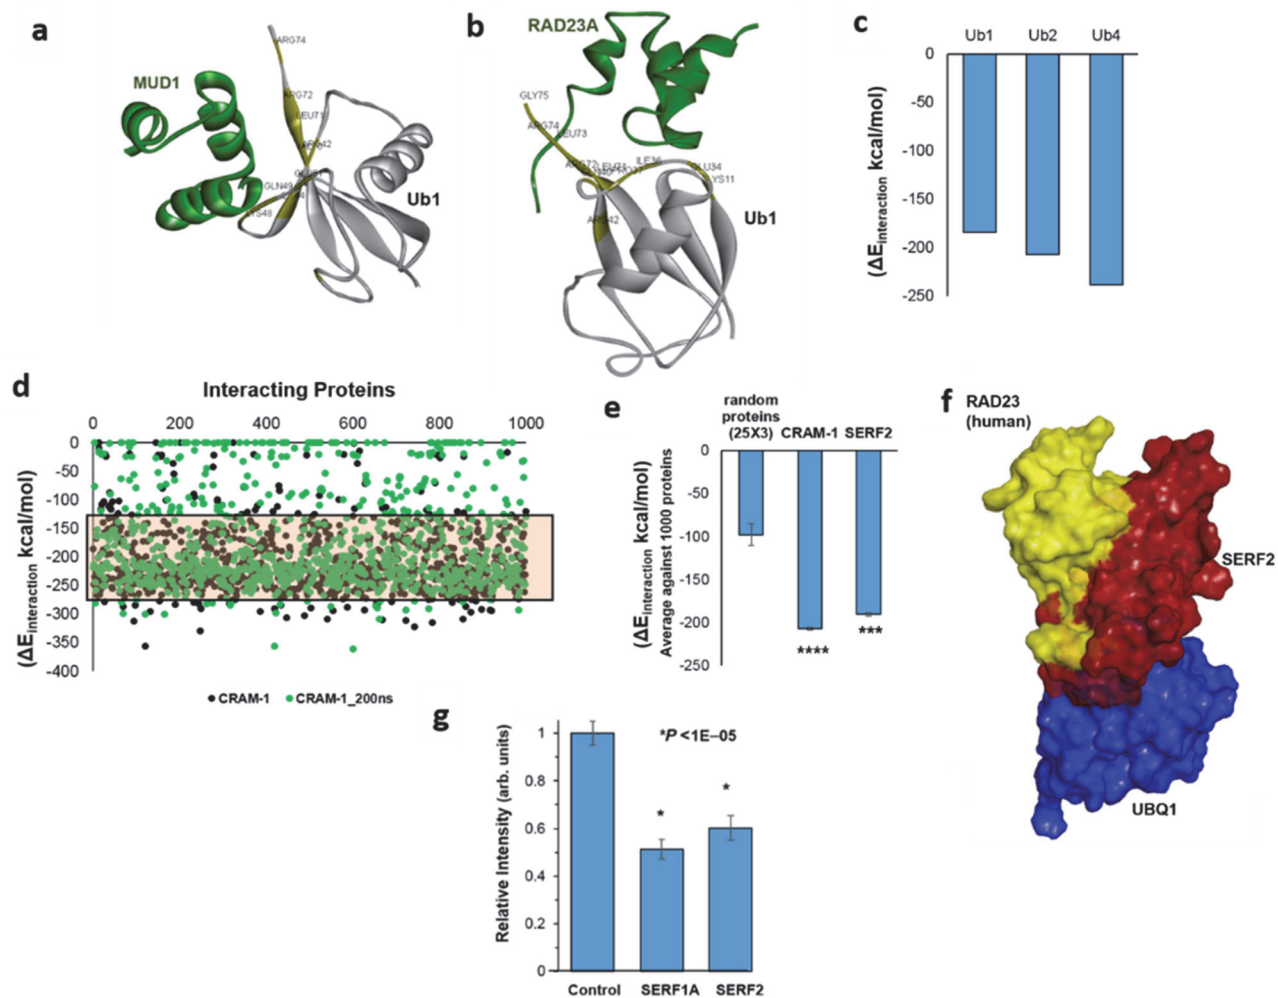

**Supplementary Figure 1:** (a) Predicted interactions of MUD1 (green) with mono-ubiquitin (gray), indicating contact residues in ubiquitin. (b) Predicted interactions of human RAD23A with mono-ubiquitin, indicating its contact residues. These results (a, b) agree with NMR chemical-shift assays<sup>23, 27, 29</sup>. (c) Predicted interaction energies of full length CRAM-1 interacting with mono-, di-, and tetra-ubiquitin. (d) Predicted interactions of CRAM-1 with 1000 random proteins. The tinted rectangle indicates the > 85% confidence interval for CRAM-1 interaction energies. (e) Interaction energies for random (control) protein pairings (3 sets of 25 proteins, each taken 2 at a time), or CRAM-1 or SERF2, each paired with 1000 proteins taken at random from PDB significance by 2-tailed t-test: \*\*\* $P < 1E-139$ ; \*\*\*\* $P < 4E-193$ . (f) Predicted interactions (or absence thereof) of RAD23A (yellow) with mono-ubiquitin (blue) bound to SERF2 (red). (g) SH-SY5Y-APP<sub>Sw</sub> neuroblastoma cells were transfected with either *SERF1A* or *SERF2* shRNA and stained with thioflavin T at 48 h post-transfection. Thioflavin-T fluorescence was quantified and divided by the number of DAPI-stained nuclei per field, to estimate amyloid deposition per cell. \* $P < 1E-05$  by 2-tailed *t* tests.

**Structural insights into pro-aggregation effects of *C. elegans* CRAM-1  
and its human ortholog SERF2**

Meenakshisundaram Balasubramaniam, Srinivas Ayyadevara, Robert J. Shmookler Reis

**Supplementary Video 1**

**Supplementary video 1:** Molecular-dynamic simulation of CRAM-1, over 200 ns.

**Structural insights into pro-aggregation effects of *C. elegans* CRAM-1  
and its human ortholog SERF2**

Meenakshisundaram Balasubramaniam, Srinivas Ayyadevara, Robert J. Shmookler Reis

**Supplementary Video 2**

**Supplementary video 2:** Molecular-dynamic simulation of SERF2, over 500 ns.
